## Global distribution and evolution of *Mycobacterium bovis* lineages

Cristina Kraemer Zimpel<sup>1,2</sup>, José Salvatore L. Patané<sup>3</sup>, Aureliano Coelho Proença Guedes<sup>4</sup>, Robson F. de Souza<sup>4</sup>, Taiana T. Silva-Pereira<sup>1,2</sup>, Naila C. Soler Camargo<sup>1,2</sup>, Antônio F. de Souza Filho<sup>2</sup>, Cássia Y. Ikuta<sup>2</sup>, José Soares Ferreira Neto<sup>2</sup>, João Carlos Setubal<sup>3,5</sup>, Marcos Bryan Heinemann<sup>2</sup>, Ana Marcia Sa Guimaraes<sup>1,\*</sup>

<sup>1</sup>Laboratory of Applied Research in Mycobacteria, Department of Microbiology, Institute of Biomedical Sciences, University of São Paulo, São Paulo, Brazil.

<sup>2</sup>Department of Preventive Veterinary Medicine and Animal Health, School of Veterinary Medicine and Animal Sciences, University of São Paulo, São Paulo, Brazil.

<sup>3</sup>Department of Biochemistry, Institute of Chemistry, University of São Paulo, São Paulo, Brazil.

<sup>4</sup>Laboratory of Protein Structure and Evolution, Department of Microbiology, Institute of Biomedical Sciences, University of São Paulo, São Paulo, Brazil.

<sup>5</sup>Biocomplexity Institute of Virginia Tech, Blacksburg, VA 24061, USA.

Correspondence:

Ana Marcia S Guimaraes

anamarcia@usp.br

## 22 Abstract

23 *Mycobacterium bovis* is the main causative agent of zoonotic tuberculosis in humans and frequently  
24 devastates livestock and wildlife worldwide. Previous studies suggested the existence of genetic groups  
25 of *M. bovis* strains based on limited DNA markers (a.k.a. clonal complexes), and the evolution and  
26 ecology of this pathogen has been only marginally explored at the global level. We have screened over  
27 2,600 publicly available *M. bovis* genomes and newly sequenced two wildlife *M. bovis* strains, gathering  
28 823 genomes from 21 countries and 21 host-species, including humans, to complete a phylogenomic  
29 analyses. We propose the existence of four distinct global lineages of *M. bovis* (Lb1, Lb2, Lb3 and Lb4)  
30 underlying the current disease distribution. These lineages are not fully represented by clonal complexes  
31 and are dispersed based on geographic location rather than host species. Our data divergence analysis  
32 agreed with previous studies reporting independent archeological data of ancient *M. bovis* [(South Siberian  
33 infected skeletons at ~2,000 years BP (before present)] and indicates that extant *M. bovis* originated during  
34 the Roman period, subsequently dispersing across the world with the discovery and settlement of the New  
35 World and Oceania, directly influenced by trades among countries.

36  
37 Keywords: *Mycobacterium bovis*, genomic, evolution, lineage, bovine tuberculosis (bTB).

## 39 Introduction

40 Tuberculosis (TB) is the leading infectious killer in the world and approximately 10 million new cases  
41 are reported annually. In 2017, 1.6 million people died of TB and over 95% of these deaths occurred in  
42 low and middle-income countries (World Health Organization, 2018). The disease is strongly linked to  
43 poverty, with its prevalence following a socioeconomic gradient within and among countries. In addition,  
44 there is a significant, and often neglected, contributor to the global disease burden, which is the zoonotic  
45 transmission of bovine TB to humans. The WHO (World Health Organization) estimated that 142,000  
46 new cases and 12,500 deaths occurred due to zoonotic TB in 2017 (World Health Organization, 2018),  
47 numbers that are likely underestimated due to lack of routine surveillance data from most countries (Olea-  
48 Popelka et al., 2017). People with zoonotic TB face arduous challenges; the etiologic agent is intrinsically  
49 resistant to pyrazinamide, one of the first-line drugs used in TB treatment, and a possible association with  
50 extra-pulmonary disease often delays diagnostics and treatment initiation. In addition, bovine TB results in  
51 severe economic losses for livestock producers worldwide, respecting no borders and repeatedly affecting  
52 animal conservation efforts due to the establishment of wildlife reservoirs or spillover events from cattle to  
53 associated animal populations. In order to eradicate TB by 2,030 as part of the United Nations (UN)  
54 Sustainable Development Goals, it is imperative that future prevention and control strategies focus on all  
55 forms of TB in humans, including its interface with animals.

56 Human and animal TB are caused by members of the *Mycobacterium tuberculosis* Complex (MTBC).  
57 The MTBC is a clonal bacterial group composed of 12 species or ecotypes with variable virulence and  
58 host tropism (Galagan, 2014). *Mycobacterium tuberculosis stricto sensu* is the main responsible for the TB  
59 numbers and is highly adapted to human hosts. On the other hand, *Mycobacterium bovis*, the causative  
60 agent of bovine TB, has a broader host range and is able to infect and cause disease in multiple host  
61 species, including humans, with variable populational persistence (Malone and Gordon, 2017). MTBC  
62 members have clonally evolved from a common ancestor with the tuberculous bacteria *Mycobacterium*  
63 *canettii*, and alignable regions of MTBC genomes are over 99.95% identical, with horizontal gene transfer  
64 and large recombination events considered absent. These pathogens have solely evolved through single  
65 nucleotide polymorphisms (SNPs), indels and small deletions of up to 12.7Kb, which translated into a  
66 phenotypic array of host tropism and virulence variations (Galagan, 2014; Brites et al., 2018).

67 Using whole-genome, SNP-based phylogenetic analyses, human-adapted MTBC have been classified  
68 into 7 lineages, with *M. tuberculosis* accounting for L1 to L4 and L7, and *Mycobacterium africanum*  
69 comprising L5 and L6. Each human-adapted MTBC lineage is associated with specific global  
70 geographical locations and lineage-associated variations in virulence, transmission capacity and in the

71 propensity to acquire drug resistance have been reported (de Jong et al., 2010; Coscolla and Gagneux,  
72 2014). Thus, regional prevalence of specific lineages or sub-lineages have consequences for the  
73 epidemiology of TB worldwide. A similar attempt to classify *M. bovis* into different genetic groups was  
74 made prior to the large-scale availability of whole-genome sequences and started with the identification of  
75 clonal complexes (CCs). Accordingly, four *M. bovis* CCs have been described (African 1 and 2, European  
76 1 and 2), and these are determined based on specific deletions ranging from 806 to 14,094 bp (base pairs),  
77 SNPs and spoligotypes. As with *M. tuberculosis* lineages, *M. bovis* CCs appear to have distinct  
78 geographical distributions, with African 1 and 2 restricted to Africa, European 2 commonly found in the  
79 Iberian Peninsula, and European 1 distributed globally (Müller et al., 2009; Berg et al., 2011; Smith et al.,  
80 2011; Rodriguez-Campos et al., 2012). Although there are no studies specifically aimed at identifying  
81 differences in virulence patterns among *M. bovis* of different CCs, numerous articles report virulence  
82 variations among strains of *M. bovis* (Wedlock et al., 1999; Waters et al., 2006; Meikle et al., 2011;  
83 Wright et al., 2013; de la Fuente et al., 2015; Vargas-Romero et al., 2016), suggesting a possible link  
84 between bacterial genetic polymorphisms and disease development, as observed in *M. tuberculosis*.

85 Since the whole-genome sequence of the first *M. bovis* strain became available in 2003 (Garnier et al.,  
86 2003), increasing efforts have been made to sequence additional strains and use whole-genome  
87 information to tackle bovine and/or wildlife TB transmission within specific outbreaks or countries  
88 (Bruning-Fann et al., 2017; Sandoval-Azuara et al., 2017; Ghebremariam et al., 2018; Kohl et al., 2018;  
89 Lasserre et al., 2018; Orloski et al., 2018a; Price-Carter et al., 2018; Razo et al., 2018). However, no  
90 studies to date have comprehensively analyzed *M. bovis* genomes at a global scale. Few studies that have  
91 compared transboundary *M. bovis* strains analyzed bacterial isolates obtained from a reduced number of  
92 countries (n<9) and included small sample sizes (Dippenaar et al., 2017; Patané et al., 2017; Zimpel et al.,  
93 2017a; Ghebremariam et al., 2018; Lasserre et al., 2018). Nevertheless, attained results suggest that *M.*  
94 *bovis* strains are likely to cluster based on geographical location (Dippenaar et al., 2017; Kraemer Zimpel  
95 et al., 2017; Lasserre et al., 2018). In our previous study, we have also shown that few *M. bovis* genomes  
96 do not carry any CC genetic marker (Zimpel et al., 2017a), a phenomenon that was recently observed in  
97 *M. bovis* isolates from one cattle herd in the USA and from slaughterhouse cattle in Eritrea  
98 (Ghebremariam et al., 2018; Orloski et al., 2018b). These findings suggest that CCs are unlikely to  
99 represent the whole diversity of *M. bovis* strains, warranting further evaluation of *M. bovis* molecular  
100 lineages (Zimpel et al., 2017a; Lasserre et al., 2018).

101 In this study, we propose and discuss the existence of at least four distinct lineages of *M. bovis* in the  
102 world. We have screened over 2,600 publicly available *M. bovis* genomes and newly sequenced two  
103 wildlife *M. bovis* strains, gathering 823 *M. bovis* genomes from 21 countries and 21 different host-species,  
104 including humans, to complete a phylogenomic analyses. We also evaluated the evolutionary origin of *M.*  
105 *bovis* strains and lineages and correlated bacterial population dynamics with historical events to gain new  
106 insights into the widespread nature of bovine TB worldwide.

## 107 **Materials and Methods**

### 108 **Genome sequencing of Brazilian *M. bovis* genomes**

109 Two Brazilian *M. bovis* isolates obtained from a captive European bison (*Bison bonasus*) (Zimpel et al.,  
110 2017b), and a captive llama (*Llama glama*) (provided by the Laboratory of Bacterial Zoonosis of the  
111 College of Veterinary Medicine, University of São Paulo, Brazil) were reactivated in Stonebrink medium  
112 and a single colony was sub-cultured for DNA extraction using a previously described protocol  
113 (Zimpel et al., 2017a). DNA quality was evaluated using Nanodrop 2000c (Thermo Scientific, MA, USA)  
114 and Agilent 2100 High Sensitivity Chip DNA Bioanalyzer (Agilent Technologies, CA, USA). All  
115 procedures involving live tuberculous mycobacteria were performed in a Biosafety Level 3+ Laboratory  
116 (BSL-3+ Prof. Dr. Klaus Eberhard Stewien) located at the Department of Microbiology, Institute of  
117 Biomedical Sciences, University of São Paulo, Brazil.

118 Paired-end genomic libraries were constructed using TruSeq DNA PCR-free sample preparation kit  
119

120 (Illumina, CA, USA), and Illumina HiSeq2500 (Illumina v3 chemistry) was used to sequence the  
121 genomic library (100 bp). These procedures were performed at the Central Laboratory of High  
122 Performance Technologies in Life Sciences (LaCTAD), State University of Campinas (UNICAMP),  
123 São Paulo, Brazil. Illumina sequencing reads were deposited in the Sequence Read Archive (SRA) from  
124 the National Center for Biotechnology Information (NCBI) (accession numbers: SRR7693912 and  
125 SRR7693877).

126

### 127 **Selection of *M. bovis* genomes**

128 We searched for genomes identified as “*Mycobacterium bovis*” deposited in SRA, NCBI. At the time  
129 of this selection (September 2018), the designation “*Mycobacterium tuberculosis* variant *bovis*” had not  
130 yet been applied. Accordingly, there were approximately 2,600 sequence read sets of *M. bovis* genomes  
131 deposited in this database. Genomes from *M. bovis* were initially selected if they: (i) were sequenced using  
132 Illumina technology [i.e., genomes sequenced using MinION (Oxford Nanopore Technologies, Oxford,  
133 United Kingdom) and PacBio (Pacific Biosciences, California, USA) were excluded]; (ii) presented  
134 known host and sample location; and (iii) were virulent *M. bovis* strains, i.e. not named as *M. bovis* BCG,  
135 *M. bovis* AN5, *M. bovis* Ravenel (Supplementary Figure S1). We focused on *M. bovis* genomes with  
136 complete metadata regarding location and host because our goal was to address the global distribution of  
137 the pathogen at country/continent level, as well as to provide insights into host-based associations.

138 From all initially selected genomes, four countries were over-represented ( $n > 100$ ) in the dataset and  
139 were subsequently subsampled (Table 1 and Supplementary Figure S1). Briefly, as to obtain host-species  
140 representation, first, all *M. bovis* genomes obtained from these countries that were isolated from non-  
141 bovine hosts were selected (except for cervids from the USA). From the remaining read sets from cattle  
142 and USA cervids, *M. bovis* genomes were randomly subsampled using the online sample size calculator  
143 (<http://www.raosoft.com/samplesize.html>), choosing an error of 5%, confidence level of 95%, and  
144 response distribution of 50% (as to maximize the sample size). A random number generator  
145 (<https://www.randomizer.org>) was used to randomly select genomes from these read sets. Following the  
146 principles of randomness and statistical sampling, the acquired sample should represent the whole selected  
147 population of *M. bovis* genomes available from these countries.

148 We also selected 28 additional *M. bovis* genomes that were sequenced or identified after September  
149 2018 (Brites et al., 2018). These isolates were from Germany ( $n=7$ ), Ghana ( $n=5$ ), Malawi ( $n=1$ ), Republic  
150 of Congo ( $n=3$ ), Russia ( $n=2$ ), Switzerland ( $n=2$ ), and United Kingdom ( $n=6$ ). The same inclusion criteria  
151 described above was followed in the selection of these genomes. In the end, a total of 949 virulent *M.*  
152 *bovis* genomes were initially selected using the above described methods and criteria (Supplementary  
153 Table S1 and Figure S1).

154

### 155 **Sequencing quality criteria**

156 FASTQ files of all 949 initially selected *M. bovis* genomes were downloaded from SRA, NCBI and  
157 trimmed using Trimmomatic (Sliding window: 5:20) (Bolger et al., 2014). To guarantee the selection of  
158 genomes with good sequence quality, the following quality criteria were considered after trimming: (i)  
159 coverage  $\geq 15x$ , (ii) median read length of 70 bp, (iii) absence of low quality sequences and anomalous GC  
160 content as determined using FastQC, (iv) mapping coverage against reference genome *M. bovis*  
161 AF2122/97 (NC\_002945.4) greater than 95% as indicated by using Burrows-Wheeler Aligner (Li and  
162 Durbin, 2010).

163

### 164 **Mapping and variant calling of reads**

165 From the quality-approved *M. bovis* read sets, duplicated reads were removed using Picard v2.18.23  
166 (<https://github.com/broadinstitute/picard>). Reads were mapped against the reference genome *M. bovis*  
167 AF2122/97 (NC\_002945.4) using Burrows-Wheeler Aligner (Li and Durbin, 2010). SNPs were called  
168 using Samtools v1.9 mpileup (Li, 2011), and VarScan v2.4.3 mpileup2cns (Koboldt et al., 2012), using

169 parameters of read depth of 7, minimum map quality and minimum base quality of 20. Generated vcf files  
170 were annotated using snpEff (Cingolani et al., 2012) based on the same reference genome, and  
171 manipulated using awk programming language to remove INDELs (insertions and deletions) and SNPs  
172 located in PE/PPE, transposases, integrases, maturase, phage and repetitive family 13E12 genes. Mixed-  
173 strain infection was defined when 15% of total SNPs was composed by heterogeneous SNPs. Read sets  
174 originating from mixed-strain cultures were excluded from downstream analyses. After sequencing quality  
175 checks, a total of 823 *M. bovis* genomes were selected for final analyses (Supplementary Figure S1).

176

### 177 **Phylogenetic reconstruction**

178 A customized script in Python language (Supplementary File 1) was used to build a matrix of the  
179 polymorphic positions identified in all *M. bovis* genomes. IQ-Tree (Nguyen et al., 2015) was used to  
180 perform a maximum likelihood (ML) phylogenetic reconstruction, using 1,000 bootstrap inferences and  
181 model of TPM3u+F+ASC+R9. Additionally, a phylogenetic tree was constructed based on maximum  
182 parsimony (MP) with standard bootstrap (1,000 replicates) using MPBoot (Hoang et al., 2018). Both  
183 phylogenies were rooted using *M. tuberculosis* H37Rv and topology was annotated using FigTree v1.4.3  
184 (<http://tree.bio.ed.ac.uk/software/figtree/>) and Mind the Graph (<https://mindthegraph.com>). In order to  
185 compare if the ML and MP trees were significantly similar, the Robinson-Foulds distance (Robinson and  
186 Foulds, 1981) between them was obtained, then tested for significance of this estimated distance by  
187 generating 1,000 random trees in IQ-Tree with the same number of taxa used in the analysis. Finally, the  
188 original distance to the distribution of distances among all random trees (for a total of 499,500  
189 comparisons) was compared, and results were plotted in a histogram done in R software 3.5.0.

190

### 191 **SNP markers**

192 Unique SNPs were manually searched using the generated SNP matrix described above. The SNP  
193 positions in the genomes were retrieved using a customized Python script (Supplementary File 1) and were  
194 annotated based on *M. bovis* AF2122/97 (NC\_002945.4).

195

### 196 **Spoligotyping and Clonal Complexes**

197 Spoligotypes of all selected genomes were investigated using SpoTyping (Xia et al., 2016). Identified  
198 genetic spacers were processed in the *Mycobacterium bovis* Spoligotype Database ([www.mbovis.org](http://www.mbovis.org)) to  
199 retrieve spoligotype pattern and SB number. Intact regions of RdEu1 (European 1 - Eu1, RD17, 1,207 bp),  
200 SNP in the *guaA* gene (European 2 - Eu2), RDAf1 (African 1 - Af1, 350 bp) and RDAf2 (African 2 - Af2,  
201 451 bp) (Müller et al., 2009; Berg et al., 2011; Smith et al., 2011; Rodriguez-Campos et al., 2012) were  
202 searched against all genomes using the BLASTn tool available in SRA, NCBI. Genomes with “no  
203 significant similarity found” as result in BLASTn when using intact regions of CC markers were mapped  
204 against the *Mycobacterium tuberculosis* H37Rv (NC\_000962.3), using CLC Genomics Workbench 11  
205 (QIAGEN, Venlo, Netherlands), to confirm the presence of RDs/SNPs.

206

### 207 **Population structure**

208 Population structure was evaluated using Principal Component Analysis (PCA) based on the generated  
209 SNP matrix and using function *princomp* in R software 3.5.0 (Mardia et al., 1979; Venables and Ripley,  
210 2002).

211

### 212 **Dating divergences**

213 Molecular dating of divergences was performed using BEAST v1.10. (Suchard et al., 2018) under a  
214 coalescent approach (extended Bayesian skyline model). The GTR+G model was implemented,  
215 altogether with ascertainment bias correction (important since only SNPs are included in the  
216 alignment). The ML tree was fixed throughout the runs. A model of uncorrelated rates across branches  
217 was implemented. Molecular rates of evolution were set within the range of a Uniform [1 x 1e-6; 2 x

218 1e-4] s/SNP-s/b/y (substitutions/SNP\_site/branch/year), based on previous studies (Ford et al., 2011;  
219 Pepperell et al., 2013; Eldholm et al., 2015; Kay et al., 2015; Lillebaek et al., 2016). The minimum age  
220 was set to 800 BP, after reasonable carbon-dating skeleton data, and to a soft upper maximum of  
221 ~7,000 BP (a conservative upper bound), both based on Bos et al. (Bos et al., 2014) posterior estimates,  
222 under a negative exponential prior. Such a soft upper bound allows older dates in our analyses, if these  
223 are likely to occur in the posterior distribution of our estimates, therefore minimizing possible biases  
224 related to an overly conservative time range. A total of two runs were executed, each with 1 billion  
225 generations. Convergence and effective sample sizes (ESSs) were monitored in Tracer v1.7  
226 (<http://tree.bio.ed.ac.uk/software/tracer>), logcombiner (within the BEAST package) was used to join  
227 results from the two runs, and treeannotator (also within the same package) was used to construct the  
228 time tree after disregarding the burnin region from each run.

229

## 230 Results and Discussion

### 231 *Mycobacterium bovis* genomes and host adaptation

232 After screening ~2,600 publicly available *M. bovis* genomes using pre-determined inclusion criteria, a  
233 total of 823 virulent *M. bovis* genomes from 21 countries and 21 different host species were selected for  
234 this study (Table 2). This sample constitutes the most comprehensive global *M. bovis* dataset ever  
235 analyzed, and includes 724 genomes published previously, and two newly sequenced genomes from this  
236 study (Supplementary Table S2). We used 17,302 nucleotide polymorphic positions detected in these  
237 genomes to construct phylogenetic trees inferred with maximum likelihood (ML) and maximum  
238 parsimony (MP) methodologies (Figure 1; Supplementary Files 2 and 3 and Figures S2 and S3). Both  
239 phylogenetic methods employed (ML and MP) generated highly similar trees (Supplementary Figures S2  
240 and S3). This observation is supported by the Robinson-Foulds distance between both trees (= 678)  
241 compared to all other comparisons among 1,000 random trees with the same number of taxa (for a total of  
242 499,500 distances obtained), for which the minimum was 1,632, and the maximum was 1,642  
243 (Supplementary Figure S4). Therefore, results are shown for ML only (Figures 1-4).

244 In the generated phylogenetic tree, host species are found dispersed among different clades (Figure 1 -  
245 colored tips), while most *M. bovis* genomes cluster according to specific geographic locations (Figure 1).  
246 This finding suggests that geographic proximity between hosts and their contact rates has played a more  
247 important role in determining host range of *M. bovis* than phylogenetic distance among hosts. The lack of  
248 host clustering supports the hypothesis of *M. bovis* being a generalist member of MTBC, able to infect  
249 different host species irrespective of the bacterial genetic makeup. Interestingly, all *M. bovis* genomes  
250 originating from the African Continent, except for South Africa, appeared as originating from relatively  
251 older nodes of the phylogenetic tree (Figure 1 - isolates emerging from nodes A and B), suggesting the  
252 continent is a possible center of dispersion.

253

### 254 Clonal complexes do not represent the whole diversity of *M. bovis* genomes

255 We have searched for CC genetic markers (Eu1 - European 1, Eu2 - European 2, Af1 - African 1, Af2 -  
256 African 2) in all selected genomes using sequence similarity detection approaches. The distribution of CCs  
257 onto the phylogenetic tree is shown in Figure 2. Accordingly, 38 out of the 823 (4.6%) analyzed *M. bovis*  
258 genomes do not have genetic markers of any of the four CCs. The remaining *M. bovis* isolates were found  
259 to cluster according to their CC classification. The vast majority (29/38, 76.32%) of *M. bovis* genomes not  
260 classified within CCs appeared dispersed, emerging from relatively ancestral nodes (Figure 2). This  
261 finding suggests that extant isolates clustering in ancient nodes were probably not included in prior studies  
262 evaluating CCs and have thus been poorly studied until now.

263 To facilitate data presentation and interpretation, we describe below the CC classification and country  
264 of origin of the analyzed *M. bovis* isolates in order from the most ancient to the most recent nodes of the  
265 phylogenetic tree depicted in Figure 2. Accordingly, three *M. bovis* isolates of the CC Af2 (Figure 2 - light  
266 blue) emerged from the most basal node (node A) of the phylogenetic tree together with 29 *M. bovis*

267 genomes without CC classification (Figure 2 - indicated as †, isolates emerging from node A). These three  
268 *M. bovis* genomes of CC Af2 comprise one isolate from a wild boar in France and two isolates from  
269 chimpanzees in China. The 29 closely-related *M. bovis* genomes without clonal complex classification  
270 were obtained in Africa [Eritrea ( $n=12$ ), Ethiopia ( $n=2$ ), Tunisia ( $n=1$ )], Europe [Italy ( $n=2$ ), Spain ( $n=7$ ),  
271 Germany ( $n=1$ )], Russia ( $n=1$ ) and the USA ( $n=3$ ). In a subsequent cluster (Figure 2 - isolates emerging  
272 from node B), it is possible to observe six *M. bovis* isolates classified as CC Af1 obtained in Africa [Ghana  
273 ( $n=3$ )] and Europe [Germany ( $n=1$ ), Switzerland ( $n=2$ )] (Figure 2 - in green).

274 To date, *M. bovis* strains of the CCs Af1 and Af2 have only been described in Africa (Berg et al., 2011;  
275 Firdessa et al., 2013). The finding of *M. bovis* strains of CC Af2 infecting chimpanzees in China may be  
276 explained by pathogen importation from the African continent into that country or, less likely, spill-over  
277 from infected livestock to captive animals. A thorough characterization of *M. bovis* strains from China in  
278 the future could elucidate which CC is more frequent in that country. On the other hand, the presence of  
279 both African CCs in countries of Europe, infecting a wild boar (France), humans (Germany) and unknown  
280 hosts (Switzerland), is interesting and warrants further investigation into the actual origin of these isolates.  
281 Ten out of the 43 *M. bovis* genomes (23.26%) described in the paragraph above originated from isolates  
282 obtained from humans, being four from Africa (Ghana=3; Tunisia=1), four from Europe (Germany=2;  
283 Italy=2), one from Russia, and one from the USA. Unfortunately, demographic characteristics of these  
284 patients are not described in the related literature (Casali et al., 2014; Walker et al., 2015; Brites et al.,  
285 2018; Kandler et al., 2018). With current bovine TB control, the zoonotic transmission of *M. bovis* in  
286 Europe and the USA is considered rare. Thus, we speculate that European and North American cases in  
287 humans may have arisen from zoonotic transmission acquired in the past that appears in elderly people  
288 (Majoor et al., 2011; Davidson et al., 2017) and/or imported human cases of zoonotic TB from countries  
289 where bovine TB is highly endemic.

290 The phylogenetic tree in Figure 2 also shows 70 *M. bovis* genomes carrying the SNP marker of the CC  
291 Eu2 (Figure 2 - in yellow, part of isolates emerging from node C). These isolates were obtained from the  
292 Americas [Brazil ( $n=3$ ), Canada ( $n=2$ ), Mexico ( $n=17$ ), USA ( $n=40$ )], Africa [South Africa ( $n=7$ )], and  
293 Europe [Germany ( $n=1$ )]. There were only three *M. bovis* genomes without CC classification isolated from  
294 humans in Germany that appeared closely related to genomes of the CC Eu2 (Figure 2 - indicated as \*\*,  
295 part of isolates also emerging from node C). The CC Eu2 has been described as dominant in the Iberian  
296 Peninsula and also detected in other countries of Europe and in Brazil (Rodriguez-Campos et al., 2012;  
297 Zimpel et al., 2017a). Its actual worldwide occurrence, however, is unknown.

298 The majority of the genomes in the dataset (706/823, 85.8%) were classified as Eu1 (i.e. having the  
299 deletion RDEu1) and originated from the Americas [USA ( $n=186$ ), Mexico ( $n=175$ ), Uruguay ( $n=4$ ),  
300 Canada ( $n=4$ ), Panama ( $n=2$ )], Oceania [New Zealand ( $n=88$ )], Europe [Great Britain ( $n=11$ ), Northern  
301 Ireland ( $n=232$ )] and Africa [South Africa ( $n=4$ )] (Figure 2 - dark blue, isolates emerging from nodes E, F  
302 and G). Interestingly, *M. bovis* of the CC Eu1 have been found to be dispersed worldwide (Smith et al.,  
303 2011), and herein, they emerged from the most recent evolutionary node of the phylogenetic tree. There  
304 were also six genomes closely and basally related to *M. bovis* genomes of CC Eu1 that did not carry any  
305 CC marker and were isolated in Europe [France ( $n=1$ ), Great Britain ( $n=1$ )] and the USA ( $n=4$ ) (Figure 2 -  
306 indicated as ▲, isolates emerging from node D).

307

### 308 SNP markers

309 We used the generated SNP matrix to search for SNPs that were unique to specific groups of genomes  
310 of the phylogenetic tree (i.e. present in 100% of the strains in the analyzed group and not present in strains  
311 outside of that group) (Figure 3 and Supplementary Table S3). A total of 15 SNPs were found to be unique  
312 to the group comprising the three genomes of *M. bovis* classified as CC Af2 and the 29 closely-related *M.*  
313 *bovis* genomes without CC classification (i.e. the group originating from the most basal node of the  
314 phylogenetic tree) (Figure 3 - in purple). Therefore, these 15 SNPs are more stable markers of this group  
315 than the RDAf2 deletion. On the other hand, 136 SNPs were found to be unique to the small group of six

316 *M. bovis* genomes with the RDAf1 deletion, further supporting the segregation of this phylogenetic group  
317 (Figure 3 - in green).

318 In addition to the SNP in *guaA* gene that determines the CC Eu2, 81 SNPs were found to be unique to  
319 *M. bovis* genomes classified as CC Eu2 in this study (data not shown). We also found 5 SNPs that were  
320 unique to the *M. bovis* of CC Eu2 and the three closely-related *M. bovis* genomes without CC  
321 classification, supporting the genetic segregation of this phylogenetic group (Figure 3 - in pink).

322 There were no SNP markers unique to *M. bovis* of the CC Eu1; the only stable genetic marker is the  
323 deletion RDEu1. The six genomes without CC classification that are closely related to *M. bovis* genomes of  
324 CC Eu1 did not share unique SNPs in common and with genomes of the CC Eu1. Interestingly, these  
325 genomes shared 43 unique SNPs with the most basal genetic groups of the phylogenetic tree. SNPs' genomic  
326 positions and annotations are reported in Supplementary Table S3.

327

### 328 **A proposal for global lineages of *M. bovis***

329 Based on the observed tree topology, CC distribution, geography, and SNP markers, we propose the  
330 existence of at least four major global lineages of *M. bovis*, which we define as Lb1, Lb2, Lb3 and Lb4  
331 (Figure 4 and Table 3). Lineage Lb1, emerging from the most basal node, is composed of 32 *M. bovis*  
332 isolates, encompassing the three representatives of CC Af2 and the 29 closely-related genomes without  
333 CC classification (Figure 4 - in purple). We provisionally propose the 15 above-described unique SNPs as  
334 identification markers for this lineage (Supplementary Table S3). The observed geographical origin of  
335 extant Lb1 isolates points towards North and East Africa and Europe, although it can also be detected, at a  
336 lower frequency, in the United States (three Lb1 isolates out of 233 *M. bovis* isolates from the USA). Lb2  
337 lineage (Figure 4 - in green) is composed of the six *M. bovis* genomes of CC Af1. These genomes are  
338 robustly segregated by the RDAf1 deletion and 136 SNP markers. It is important to highlight, however,  
339 that further genomes should be sequenced to fully characterize this lineage. The extant Lb2 comprise  
340 isolates from Ghana (n=3), Germany (n=1) and Switzerland (n=2). Unfortunately, host information was  
341 not available for the isolates obtained in Switzerland. It is possible that this *M. bovis* strain was isolated  
342 from a human patient, which precludes geographical origin analyses due to human migration.  
343 Nevertheless, both extant Lb1 and Lb2 have strong ties to North, East and West Africa and to a lesser  
344 degree with Europe.

345 Lb3 is composed of the 70 *M. bovis* of CC Eu2 and the three genomes without CC classification  
346 (Figure 4 - in pink), being supported by five unique SNPs (Supplementary Table S3). Interestingly, *M.*  
347 *bovis* genomes of CC Eu2 comprises a rapidly evolving and geographically diverse sublineage (Lb3.1)  
348 when compared to the three genomes obtained from humans in Germany (Lb3.2). Again, geographic  
349 origin and country history of these infected humans are not described in the related literature (Walker et  
350 al., 2015) and it is possible that these patients acquired the infection in the past, as described above,  
351 representing isolates of an older origin and/or in another country. The CC Eu2 is not a stable marker for  
352 Lb3 as a whole; instead, the five unique SNPs may be used as identification markers for Lb3  
353 (Supplementary Table S3).

354 Finally, lineage Lb4 (Figure 4 - in blue) is composed of 706 genomes of *M. bovis* of the CC Eu1,  
355 indicating that RDEu1 is a stable marker of this evolutionarily recent lineage. Lineage Lb4 is composed of  
356 a higher number of genomes when compared to other lineages due to over-representation of  
357 geographically-restricted genomes from United States, New Zealand, Northern Ireland and Mexico. The  
358 ladder-like tips observed in Lb4 are consistent with recent population expansion across subpopulations of  
359 Lb4, which may be directly influenced by the persistence of *M. bovis* in different wildlife populations,  
360 variations in the efficiency of bovine TB control programs and geographic isolation. The tree topography  
361 suggests that once an ancestral *M. bovis* strain was introduced into each of these countries, this  
362 subpopulation clonally expanded in geographic isolation. This finding agrees with cattle trade and export  
363 patterns from Europe and Africa into the New World, Oceania, and Northern Ireland, which eventually led  
364 to the introduction of bovine TB in these regions.

365 With the described SNPs and deletions, it is not possible to determine whether the remaining six  
366 closely-related genomes without a CC marker (from France, Great Britain, and the USA) can be classified  
367 within a specific lineage (Figure 4 - in black). These genomes do not share unique genetic markers with  
368 Lb4 or Lb3 (i.e. SNPs not present in any other lineage), but do share 43 SNPs with the more ancient  
369 lineages Lb1, Lb2 and Lb3 (Figure 3). Further genomes should be sequenced to better characterize this  
370 group.

371

### 372 **Spoligotyping patterns are correlated with *M. bovis* lineages**

373 To further support our findings related to the global *M. bovis* lineages, we also evaluated the  
374 spoligotype of all isolates. There was a good association between spoligotype and the four *M. bovis*  
375 lineages (Table 4), except for SB0265 and SB1345, which appear in both Lb3 and Lb4. Thus, the vast  
376 majority of the patterns were specific to the predicted lineages, demonstrating that spoligotyping can be a  
377 supportive tool to infer these groups, albeit keeping in mind that homoplasmy is a common phenomenon in  
378 spoligotypes (i.e. identical spoligotype patterns can occur independently in unrelated lineages because  
379 the loss of spacer sequences is a common event) (Warren et al., 2002) and may also occur with lineage  
380 classification (e.g. SB0265 and SB1345 appear in Lb3 and Lb4).

381

### 382 **Principal component analysis**

383 To further evaluate the genetic relationship among *M. bovis* lineages, the SNP matrix was subjected to  
384 a principal component analysis (Figure 5). Results suggest a robust segregation of the modern lineage Lb4  
385 and a close genetic relatedness of the more ancient lineages Lb1, Lb2 and Lb3. These findings directly  
386 reflect the results of the phylogenetic tree and SNP markers, as the most basal clusters appeared more  
387 closely related and shared 43 unique SNPs. The resulting PCA analysis is similar to what is observed  
388 using an equivalent approach with *M. tuberculosis* lineages, in which the modern lineages of *M.*  
389 *tuberculosis* (L2, L3 e L4) appear closely related, whereas the ancient lineages (L1, L5, L6 and L7) are  
390 found segregated from the rest, in different groups (Brites et al., 2018). It also suggests that Lb4, which is  
391 markedly characterized by the Eu1 deletion, is likely composed of three sublineages that correspond to *M.*  
392 *bovis* genomes emerging from nodes E, F, G of the phylogenetic tree depicted in Figure 1. The *M. bovis*  
393 genomes emerging from node G are mostly from North America (two genomes only are from Panama and  
394 Uruguay), which may indicate that these Lb4 sublineages have been evolving under geographical  
395 segregation. Our findings highlight the need to further evaluate the virulence phenotype of the proposed  
396 *M. bovis* lineages, as ancient and modern *M. tuberculosis* lineages display distinct abilities to cause disease  
397 (de Jong et al., 2010; Portevin et al., 2011).

398

### 399 **Evolutionary scenario for the origin of *M. bovis***

400 Recent analyses point towards the evolutionary rate defined by Bos et al. (Bos et al., 2014) as being the  
401 most plausible to explain the trajectory of MTBC (Menardo et al., 2019; O'Neill et al., 2019). Our  
402 posterior Bayesian estimate indicates that the time of the most recent common ancestor (MRCA) for extant  
403 *M. bovis* lineages is 430 - 2,394 years BP (Before Present) (Figure 4). This maximum time obtained (2,394  
404 years BP) (Figure 4) agrees with the archeological finding of *M. bovis* (defined by the loss of RD4)  
405 causing infection in four human skeletons from the Iron Age in South Siberia, with carbon-dating placing  
406 them within the 1,761 - 2,199 years BP range (Taylor et al., 2007). Interestingly, these ancient *M. bovis*  
407 strains do not have the deletion marker of CC Eu1 (i.e. RD17), serving as supportive evidence that Lb4 is  
408 indeed a recently-evolved lineage of *M. bovis*. The oldest description of tubercle ('phymata') lesions in  
409 cattle (and also in sheep and pigs) was done by the Greek physician Hippocrates (2,480-2,390 BP)  
410 (Herzog, Basel, 2003), also overlapping our maximum estimate for the MRCA.

411 Considering the upper-end time of 2,394 years BP, the predicted origin of the extant *M. bovis* lineages  
412 overlaps with the Ancient Roman period (2645-1544 BP). The paucity of *M. bovis* genomes from Africa,  
413 particularly East, West and North of Africa, precludes us to rule out an African origin of *M. bovis*.

414 However, as most extant Lb1 and Lb2 strains are from Europe and Africa, we speculate that the beginning  
415 of *M. bovis* genetic diversification may have had an important contribution from ancient Romans, possibly  
416 due to their influence on animal husbandry practices in the Mediterranean and North of Africa. We should  
417 not neglect the fact that the world saw a demographical explosion and a deep connection between different  
418 cultures and communities during the Ancient Roman period (Jongman, 2012; Hanson et al., 2017). It has  
419 been suggested that this demographic explosion and economic rise greatly contributed to the spread of  
420 human TB worldwide, with naïve human populations from rural areas being exposed to the disease when  
421 moving to larger cities (Herzog, Basel, 2003; O'Neill et al., 2019). The economical flourishing was  
422 followed by a steep rise in agriculture and livestock capacity (Jongman, 2012). Archeological findings  
423 related to changes in cattle body size between Neolithic times and the Roman period (Meadow, 1988,  
424 1989; Meadow and Zeder, 2004; Trentacoste et al., 2018) suggest the occurrence of modifications in cattle  
425 herding management in the Roman period, including improved feeding practices, probably aimed at  
426 increasing production capacity for draft, meat and/or milk (Kron, 2002). Reasons for breeding cattle varied  
427 considerably throughout the Roman territory and beyond due to culture traditions, diet preferences and  
428 climate conditions (Itan et al., 2009; Valenzuela-Lamas and Albarella, 2017). Nevertheless, by  
429 intensifying production systems and animal trade, which was most likely not centered solely in Roman  
430 territory, bovine TB may have dispersed significantly.

431 We cannot assume for certain that the disease, bovine TB, exclusively originated during the Ancient  
432 Roman period. The disease may have been present in cattle before this time, although caused by a different  
433 ancestor of the extant *M. bovis* lineages. It is still unclear if the ancestor of MTBC was a specific human  
434 pathogen or a generalist microorganism able to infect multiple host species (Brites et al., 2018). In the  
435 latter case, the intensification of the livestock system and increase in animal and human population density  
436 may have selected for pathogens either more adapted to animals (*M. bovis*) or more adapted to human  
437 beings (*M. tuberculosis*) over evolutionary time. It should be noted that genomes from representative *M.*  
438 *bovis* isolates from Eastern and Western Asia have yet to be sequenced and analyzed. The lack of  
439 information from that continent makes it impossible to fully explain the finding of an ancient human  
440 infection near present Mongolian border in Russia (1,761 - 2,199 years BP) (Taylor et al., 2007).  
441 Alternatively, the well-known commercial trade between the Roman Empire and Asia may also account  
442 for this dispersal.

443

#### 444 **Bovine TB after the 16<sup>th</sup> century**

445 Our dating estimates and evolutionary predictions reveal a complex relationship between spatial  
446 dispersal and expansion of *M. bovis*. Bovine TB worldwide distribution is certainly influenced by import  
447 and export of cattle breeds over time. Non-European countries imported specialized breed cattle from  
448 single sources and then exported to other countries, while others imported animals from multiple locations.  
449 Estimates show that the MRCAs of extant *M. bovis* isolates occurring in Northern Ireland date between  
450 54 to 325 BP. Archeological data from cattle specimens found in the UK (United Kingdom) indicates  
451 that these animals had a shared ancestry with wild British aurochs, being unrelated to the modern  
452 European taurine (Orlando, 2015). Accordingly, in Northern Ireland, cattle have been the mainstay of  
453 farming since the neolithic period (about 6,000 BP). Therefore, despite the ancient presence of cattle in  
454 these regions, the introduction of the extant *M. bovis* lineage Lb4 seems to be a more recent event,  
455 possibly due to the importation of taurine cattle from other areas of Europe.

456 Most of the USA isolates clustered in Lb4 (186/233), a few in Lb3 (40/233) and only three in Lb1  
457 (3/233). A similar trend is observed in Mexico, with the majority of the isolates clustered in Lb4 (175/192)  
458 and fewer representatives in Lb3 (17/192). Our dating estimates are consistent with bovine TB  
459 introduction into these countries during the New World colonization period, with Lb3 dating from 137 to  
460 906 BP (USA) and from 41 to 241 BP (Mexico), and Lb4 dating from 71 to 411 BP (USA) and 216 to  
461 1151 BP (Mexico). The first cattle to be introduced into the USA came from the Iberian Peninsula in the  
462 16<sup>th</sup> century. This introduction was followed by cattle importation from Mexico (which also received

463 animals from the Iberian Peninsula) and from England (Martínez et al., 2012). This is consistent with the  
464 introduction of Lb3 (CC Eu2) and Lb4 (CC Eu1), common lineages in the Iberian Peninsula and the UK,  
465 respectively. Isolates from USA and Mexico frequently clustered together, consistent with the close cattle  
466 trade relationship between these two countries throughout modern history.

467 At least two main introductions of Lb4 may have happened in New Zealand. The first is estimated to  
468 have occurred between 92 and 488 BP, while the second from 60 to 333 BP. Breeds of cattle were  
469 introduced into New Zealand in the 19<sup>th</sup> century (Livingstone et al., 2015), which is within our time period  
470 range and suggests consequent spreading to wildlife. In contrast, *M. bovis* genomes from South Africa  
471 appeared clustered in Lb3 and Lb4 (Smith et al., 2011). Despite the small sample size, they are not present  
472 in the most ancient lineages, Lb1 and Lb2. In fact, previous genotyping studies have shown that the most  
473 common *M. bovis* CC in South Africa is Eu1, i.e. Lb4. Thus, in agreement with previous hypotheses  
474 (Michel et al., 2009; Smith et al., 2011), it is likely that bovine TB was introduced into South Africa  
475 following European colonization, and subsequently spilled over to naïve wildlife, with destructive  
476 consequences (Michel et al., 2006), as exemplified by *M. bovis* genomes from kudu, lions and buffalos  
477 analyzed herein.

478

### 479 **Concluding remarks**

480 We propose the existence of at least four global lineages of *M. bovis*, named Lb1 and Lb2, occurring  
481 mostly in Africa and Europe, Lb3 present mainly in the Americas, Europe and South Africa, and Lb4  
482 dispersed worldwide. Because these lineages tend to cluster based on geographical location rather than  
483 host species, it reinforces the idea that bovine TB eradication will only be attained once the disease is  
484 controlled in wildlife and vice-versa. The observed lack of host specificity supports the hypothesis of *M.*  
485 *bovis* being a generalist member of MTBC. Nonetheless, *M. bovis* ability to be transmitted among cattle is  
486 the main reason why this pathogen has spread geographically over evolutionary time, because of animal  
487 trade.

488 CC and/or SNP markers are proposed for each lineage. Our results shown that CC markers are only  
489 stable for Lb2 (Af1) and Lb4 (Eu1), while Lb1 and Lb3 can be better identified using whole genome  
490 sequencing and a provisional set of SNPs. The lack of stable CC markers in the most ancient lineage, Lb1,  
491 indicates that these pathogens have been the least studied, and that there is an urgent need for additional  
492 evaluations of *M. bovis* isolates from Africa, as well as from Asia (given the low number of genome  
493 representatives from this continent). Further sequencing of *M. bovis* isolates throughout the world will  
494 provide the opportunity to refine the identification of SNP and deletion markers specific of each lineage, as  
495 well as provide accurate data from geographic areas not explored in this study.

496 Our results delineate independent evolutionary trajectories of bacterial subpopulations (i.e. lineages) of  
497 *M. bovis* underlying the current disease distribution. Whether or not these events are associated with  
498 further specialization of *M. bovis* to the bovine species and breeds or increased/decreased virulence of this  
499 pathogen in domesticated and/or wildlife have yet to be determined. Lineages of *M. tuberculosis* are  
500 known for their virulence variations, warranting further similar studies regarding *M. bovis* lineages.

501 Finally, our dating estimates for the MCRA of extant *M. bovis* lineages agreed with previous studies  
502 based on independent archeological data (South Siberian skeletons at ~2,000 BP). The results suggest that  
503 dispersion and expansion of the species may have increased during the Ancient Roman period, stimulated  
504 by the demographic expansion and rising need for cattle breeding. This may have contributed to an  
505 increased number of TB cases in humans, albeit of zoonotic origin. Subsequently, the history of economic  
506 trade, especially involving animals, may explain the continuous spread of bovine TB worldwide. By  
507 understanding the evolutionary origin and genomic diversification of *M. bovis*, we expect that the results  
508 presented herein will help pave the way to avoid future outbreaks of the disease in cattle, wildlife and  
509 humans.

510

### 511 **Acknowledgements**

512 The authors are in debt to Gisele Oliveira de Souza and Carolina Bertelli de Souza Ferreira from the  
513 University of São Paulo, São Paulo, Brazil for invaluable technical assistance. We also thank the  
514 LaCTAD, UNICAMP, Campinas, Brazil for aiding in the genome sequencing of *M. bovis* isolates, and  
515 CEFAP, University of São Paulo, for computer core services. We are in debt with Dr Paulo Eduardo  
516 Brandão for continuous mentoring support throughout this study.

517

### 518 **Author Contributions**

519 CZ: Performed and/or participated in all experiments, analyzed and interpreted the data, and wrote the  
520 manuscript. JP: Designed and performed dating divergence experiments, analyzed and interpreted the  
521 resulting data. ACG: Performed experiments involving the generation and analyses of the SNP matrix.  
522 RS: Designed and supervised specific bioinformatics analyses. TP: Provided bioinformatic assistance for  
523 the phylogenomic analysis. NC: Provided bioinformatics assistance for the phylogenomic analysis. AF:  
524 Performed experiments involving bacterial isolation and DNA extraction. CI: Performed experiments  
525 involving bacterial isolation and DNA extraction. JN, JS, MH: Designed experiments and analyzed the  
526 data. AMG: Designed and coordinated the study, analyzed the data and wrote the manuscript.

527

### 528 **Funding**

529 Fellowships for CZ, JP, ACG, TS, NC, AF, CI are provided by CNPq (Conselho Nacional de Pesquisa  
530 Científica), Ministry of Science, Brazil (134266/2017-0; and 140003/2019-3), CAPES (Coordenação de  
531 Aperfeiçoamento de Pessoal de Nível Superior), Ministry of Education, Brazil (88887.283881/2018-00;  
532 1650900; and 1539669) and São Paulo Research Foundation (FAPESP) (2017/04617-3; and 2017/20147-  
533 7). This study was financed in part by CAPES (Finance Code 001). Main research funding was made  
534 available through Morris Animal Foundation (grant number D17ZO-307).

535

### 536 **Competing Interests**

537 The authors declare that they have no competing interests.

538

### 539 **References**

- 540 Berg, S., Garcia-Pelayo, M. C., Müller, B., Hailu, E., Asimwe, B., Kremer, K., et al. (2011). African 2,  
541 a clonal complex of *Mycobacterium bovis* epidemiologically important in East Africa. *J.*  
542 *Bacteriol.* 193, 670–8. doi:10.1128/JB.00750-10.
- 543 Bolger, A. M., Lohse, M., and Usadel, B. (2014). Trimmomatic: a flexible trimmer for Illumina  
544 sequence data. *Bioinformatics* 30, 2114–2120. doi:10.1093/bioinformatics/btu170.
- 545 Bos, K. I., Harkins, K. M., Herbig, A., Coscolla, M., Weber, N., Comas, I., et al. (2014). Pre-  
546 Columbian mycobacterial genomes reveal seals as a source of New World human tuberculosis.  
547 *Nature* 514, 494–7. doi:10.1038/nature13591.
- 548 Brites, D., Loiseau, C., Menardo, F., Borrell, S., Boniotti, M. B., Warren, R., et al. (2018). A New  
549 Phylogenetic Framework for the Animal-Adapted *Mycobacterium tuberculosis* Complex. *Front.*  
550 *Microbiol.* 9, 2820. doi:10.3389/fmicb.2018.02820.
- 551 Bruning-Fann, C., Robbe-Austerman, S., Kaneene, J., Thomsen, B., Jr, J. T., Ray, J., et al. (2017). Use  
552 of whole-genome sequencing and evaluation of the apparent sensitivity and specificity of  
553 antemortem tuberculosis tests in the investigation of an unusual outbreak of *Mycobacterium bovis*  
554 infection in a Michigan dairy herd. 251, 206–216. doi:10.2460/javma.251.2.206.
- 555 Casali, N., Nikolayevskyy, V., Balabanova, Y., Harris, S. R., Ignatyeva, O., Kontsevaya, I., et al.  
556 (2014). Evolution and transmission of drug-resistant tuberculosis in a Russian population. *Nat.*  
557 *Genet.* 46, 279–86. doi:10.1038/ng.2878.
- 558 Cingolani, P., Platts, A., Wang, L. L., Coon, M., Nguyen, T., Wang, L., et al. (2012). A program for  
559 annotating and predicting the effects of single nucleotide polymorphisms, SnpEff. *Fly (Austin)*. 6,  
560 80–92. doi:10.4161/fly.19695.

- 561 Coscolla, M., and Gagneux, S. (2014). Consequences of genomic diversity in *Mycobacterium*  
562 tuberculosis. *Semin. Immunol.* 26, 431–444. doi:10.1016/j.smim.2014.09.012.
- 563 Davidson, J. A., Loutet, M. G., O’Connor, C., Kearns, C., Smith, R. M. M., Lalor, M. K., et al. (2017).  
564 Epidemiology of *Mycobacterium bovis* Disease in Humans in England, Wales, and Northern  
565 Ireland, 2002–2014. *Emerg. Infect. Dis.* 23, 377–386. doi:10.3201/eid2303.161408.
- 566 de Jong, B. C., Adetifa, I., Walther, B., Hill, P. C., Antonio, M., Ota, M., et al. (2010). Differences  
567 between tuberculosis cases infected with *Mycobacterium africanum*, West African type 2, relative  
568 to Euro-American *Mycobacterium tuberculosis*: an update. *FEMS Immunol. Med. Microbiol.* 58,  
569 102–5. doi:10.1111/j.1574-695X.2009.00628.x.
- 570 de la Fuente, J., Díez-Delgado, I., Contreras, M., Vicente, J., Cabezas-Cruz, A., Tobes, R., et al. (2015).  
571 Comparative Genomics of Field Isolates of *Mycobacterium bovis* and *M. caprae* Provides  
572 Evidence for Possible Correlates with Bacterial Viability and Virulence. *PLoS Negl. Trop. Dis.* 9,  
573 1–22. doi:10.1371/journal.pntd.0004232.
- 574 Dippenaar, A., Parsons, S. D. C., Miller, M. A., Hlokwe, T., Gey van Pittius, N. C., Adroub, S. A., et  
575 al. (2017). Progenitor strain introduction of *Mycobacterium bovis* at the wildlife-livestock  
576 interface can lead to clonal expansion of the disease in a single ecosystem. *Infect. Genet. Evol.* 51,  
577 235–238. doi:10.1016/J.MEEGID.2017.04.012.
- 578 Eldholm, V., Monteserin, J., Rieux, A., Lopez, B., Sobkowiak, B., Ritacco, V., et al. (2015). Four  
579 decades of transmission of a multidrug-resistant *Mycobacterium tuberculosis* outbreak strain. *Nat.*  
580 *Commun.* 6, 7119. doi:10.1038/ncomms8119.
- 581 Firdessa, R., Berg, S., Hailu, E., Schelling, E., Gumi, B., Erenso, G., et al. (2013). *Mycobacterial*  
582 lineages causing pulmonary and extrapulmonary tuberculosis, Ethiopia. *Emerg. Infect. Dis.* 19,  
583 460–3. doi:10.3201/eid1903.120256.
- 584 Ford, C. B., Lin, P. L., Chase, M. R., Shah, R. R., Iartchouk, O., Galagan, J., et al. (2011). Use of  
585 whole genome sequencing to estimate the mutation rate of *Mycobacterium tuberculosis* during  
586 latent infection. *Nat. Genet.* 43, 482–486. doi:10.1038/ng.811.
- 587 Galagan, J. E. (2014). Genomic insights into tuberculosis. *Nat. Rev. Genet.* 15, 307–320.  
588 doi:10.1038/nrg3664.
- 589 Garnier, T., Eiglmeier, K., Camus, J., Medina, N., Mansoor, H., Pryor, M., et al. (2003). The Complete  
590 Genome Sequencing of *Mycobacterium bovis*. *Proc. Natl. Acad. Sci.* 100, 7887–82.  
591 doi:10.1073/pnas.1130426100.
- 592 Ghebremariam, M. K., Hlokwe, T., Rutten, V. P. M. G., Allepuz, A., Cadmus, S., Muwonge, A., et al.  
593 (2018). Genetic profiling of *Mycobacterium bovis* strains from slaughtered cattle in Eritrea. *PLoS*  
594 *Negl. Trop. Dis.* 12, e0006406. doi:10.1371/journal.pntd.0006406.
- 595 Hanson, J. W., Ortman, S. G., and Lobo, J. (2017). Urbanism and the division of labour in the Roman  
596 Empire. *J. R. Soc. Interface* 14. doi:10.1098/rsif.2017.0367.
- 597 Herzog, Basel, H. (2003). History of Tuberculosis. *Respiration* 65, 5–15. doi:10.1159/000029220.
- 598 Hoang, D. T., Vinh, L. S., Flouri, T., Stamatakis, A., von Haeseler, A., and Minh, B. Q. (2018).  
599 MPBoot: fast phylogenetic maximum parsimony tree inference and bootstrap approximation.  
600 *BMC Evol. Biol.* 18, 11. doi:10.1186/s12862-018-1131-3.
- 601 Itan, Y., Powell, A., Beaumont, M. A., Burger, J., and Thomas, M. G. (2009). The origins of lactase  
602 persistence in Europe. *PLoS Comput. Biol.* 5, 17–19. doi:10.1371/journal.pcbi.1000491.
- 603 Jongman, W. M. (2012). “Re-constructing the roman economy,” in *The Cambridge History of*  
604 *Capitalism Volume I: The Rise of Capitalism: From Ancient Origins to 1848*, eds. Larry Neal and  
605 Jeffrey G. Williamson (Cambridge: Cambridge University Press), 75–100.  
606 doi:10.1017/CHO9781139095099.004.
- 607 Kandler, J. L., Mercante, A. D., Dalton, T. L., Ezewudo, M. N., Cowan, L. S., Burns, S. P., et al.  
608 (2018). Validation of Novel *Mycobacterium tuberculosis* Isoniazid Resistance Mutations Not  
609 Detectable by Common Molecular Tests. *Antimicrob. Agents Chemother.* 62.

- 610 doi:10.1128/AAC.00974-18.
- 611 Kay, G. L., Sergeant, M. J., Zhou, Z., Chan, J. Z.-M., Millard, A., Quick, J., et al. (2015). Eighteenth-  
612 century genomes show that mixed infections were common at time of peak tuberculosis in Europe.  
613 *Nat. Commun.* 6, 6717. doi:10.1038/ncomms7717.
- 614 Koboldt, D. C., Zhang, Q., Larson, D. E., Shen, D., McLellan, M. D., Lin, L., et al. (2012). VarScan 2:  
615 somatic mutation and copy number alteration discovery in cancer by exome sequencing. *Genome*  
616 *Res.* 22, 568–76. doi:10.1101/gr.129684.111.
- 617 Kohl, T. A., Utpatel, C., Niemann, S., and Moser, I. (2018). *Mycobacterium bovis* persistence in two  
618 different captive wild animal populations in Germany: A longitudinal molecular epidemiological  
619 study revealing pathogen transmission by whole-genome sequencing. *J. Clin. Microbiol.* 56, 1–9.  
620 doi:10.1128/JCM.00302-18d.
- 621 Kraemer Zimpel, C., Brandão, P. E., Souza Filho, A. F. de, De Souza, R. F., Ykuta, C. Y., Soares  
622 Ferreira Neto, J., et al. (2017). Complete genome sequencing of *Mycobacterium bovis* SP38 and  
623 comparative genomics of *Mycobacterium bovis* and *M. tuberculosis* strains. *Front. Microbiol.* 8,  
624 2389. doi:10.3389/FMICB.2017.02389.
- 625 Kron, G. (2002). Archaeozoology and the Productivity of Roman Livestock Farming. *Münstersche*  
626 *Beiträge zur Antiken Handel.* 21, 53–73.
- 627 Lasserre, M., Fresia, P., Greif, G., Iraola, G., Castro-Ramos, M., Juambeltz, A., et al. (2018). Whole  
628 genome sequencing of the monomorphic pathogen *Mycobacterium bovis* reveals local  
629 differentiation of cattle clinical isolates. *BMC Genomics* 19, 1–14. doi:10.1186/s12864-017-4249-  
630 6.
- 631 Li, H. (2011). A statistical framework for SNP calling, mutation discovery, association mapping and  
632 population genetical parameter estimation from sequencing data. *Bioinformatics* 27, 2987–93.  
633 doi:10.1093/bioinformatics/btr509.
- 634 Li, H., and Durbin, R. (2010). Fast and accurate long-read alignment with Burrows–Wheeler transform.  
635 *Bioinformatics* 26, 589–595. doi:10.1093/bioinformatics/btp698.
- 636 Lillebaek, T., Norman, A., Rasmussen, E. M., Marvig, R. L., Folkvardsen, D. B., Andersen, Å. B., et  
637 al. (2016). Substantial molecular evolution and mutation rates in prolonged latent *Mycobacterium*  
638 *tuberculosis* infection in humans. *Int. J. Med. Microbiol.* 306, 580–585.  
639 doi:10.1016/J.IJMM.2016.05.017.
- 640 Livingstone, P. G., Hancox, N., Nugent, G., and de Lisle, G. W. (2015). Toward eradication: the effect  
641 of *Mycobacterium bovis* infection in wildlife on the evolution and future direction of bovine  
642 tuberculosis management in New Zealand. *N. Z. Vet. J.* 63 Suppl 1, 4–18.  
643 doi:10.1080/00480169.2014.971082.
- 644 Majoor, C. J., Magis-Escurra, C., van Ingen, J., Boeree, M. J., and van Soolingen, D. (2011).  
645 Epidemiology of *Mycobacterium bovis* Disease in Humans, the Netherlands, 1993–2007. *Emerg.*  
646 *Infect. Dis.* 17, 457–463. doi:10.3201/eid1703.101111.
- 647 Malone, K. M., and Gordon, S. V (2017). Strain Variation in the *Mycobacterium tuberculosis*  
648 Complex: Its Role in Biology, Epidemiology and Control. 1019. doi:10.1007/978-3-319-64371-7.
- 649 Mardia, K. V., Kent, J. T., and Bibby, J. M. (1979). *Multivariate analysis*. London: Academic Press.
- 650 Martínez, A. M., Gama, L. T., Cañón, J., Ginja, C., Delgado, J. V., Dunner, S., et al. (2012). Genetic  
651 Footprints of Iberian Cattle in America 500 Years after the Arrival of Columbus. *PLoS One* 7,  
652 e49066. doi:10.1371/journal.pone.0049066.
- 653 Meadow, R. H. (1988). Archeology: The Archaeology of Animals. Simon J. M. Davis. *Am. Anthropol.*  
654 90, 697. doi:10.1525/aa.1988.90.3.02a00220.
- 655 Meadow, R. H. (1989). “Osteological evidence for process of animal domestication,” in *The Walking*  
656 *larder : patterns of domestication, pastoralism, and predation*, 80–90.
- 657 Meadow, R., and Zeder, M. (2004). *Approaches to Faunal Analysis in the Middle East*.
- 658 Meikle, V., Bianco, M. V, Blanco, F. C., Gioffré, A., Garbaccio, S., Vagnoni, L., et al. (2011).

- 659 Evaluation of pathogenesis caused in cattle and guinea pig by a *Mycobacterium bovis* strain  
660 isolated from wild boar. *BMC Vet. Res.* 7, 37. doi:10.1186/1746-6148-7-37.
- 661 Menardo, F., Duchene, S., Brites, D., and Gagneux, S. (2019). The molecular clock of *Mycobacterium*  
662 *tuberculosis*. *bioRxiv* <https://doi.org/10.1101/532390>. doi:cc.
- 663 Michel, A. L., Bengis, R. G., Keet, D. F., Hofmeyr, M., Klerk, L. M. de, Cross, P. C., et al. (2006).  
664 Wildlife tuberculosis in South African conservation areas: Implications and challenges. *Vet.*  
665 *Microbiol.* 112, 91–100. doi:10.1016/j.vetmic.2005.11.035.
- 666 Michel, A. L., Coetzee, M. L., Keet, D. F., Maré, L., Warren, R., Cooper, D., et al. (2009). Molecular  
667 epidemiology of *Mycobacterium bovis* isolates from free-ranging wildlife in South African game  
668 reserves. *Vet. Microbiol.* 133, 335–343. doi:<https://doi.org/10.1016/j.vetmic.2008.07.023>.
- 669 Müller, B., Hilty, M., Berg, S., Garcia-Pelayo, M. C., Dale, J., Boschioli, M. L., et al. (2009). African  
670 1, an epidemiologically important clonal complex of *Mycobacterium bovis* dominant in Mali,  
671 Nigeria, Cameroon, and Chad. *J. Bacteriol.* 191, 1951–60. doi:10.1128/JB.01590-08.
- 672 Nguyen, L.-T., Schmidt, H. A., von Haeseler, A., and Minh, B. Q. (2015). IQ-TREE: A Fast and  
673 Effective Stochastic Algorithm for Estimating Maximum-Likelihood Phylogenies. *Mol. Biol.*  
674 *Evol.* 32, 268–274. doi:10.1093/molbev/msu300.
- 675 O’Neill, M. B., Shockey, A., Zarley, A., Aylward, W., Eldholm, V., Kitchen, A., et al. (2019). Lineage  
676 specific histories of *Mycobacterium tuberculosis* dispersal in Africa and Eurasia. *Mol. Ecol.* 28,  
677 mec.15120. doi:10.1111/mec.15120.
- 678 Olea-Popelka, F., Muwonge, A., Perera, A., Dean, A. S., Mumford, E., Erlacher-Vindel, E., et al.  
679 (2017). Zoonotic tuberculosis in human beings caused by *Mycobacterium bovis* - a call for action.  
680 *Lancet Infect. Dis.* 17, e21–e25. doi:10.1016/S1473-3099(16)30139-6.
- 681 Orlando, L. (2015). The first aurochs genome reveals the breeding history of British and European  
682 cattle. *Genome Biol.* 16, 225. doi:10.1186/s13059-015-0793-z.
- 683 Orloski, K., Robbe-austerman, S., Stuber, T., Hench, B., and Schoenbaum, M. (2018a). Whole genome  
684 sequencing of *Mycobacterium bovis* isolated from livestock in the United States, 1989-2018.  
685 *Front. Vet. Sci.* 5:253, 1–23. doi:10.3389/fvets.2018.00253.
- 686 Orloski, K., Robbe-austerman, S., Stuber, T., Hench, B., and Schoenbaum, M. (2018b). Whole genome  
687 sequencing of *Mycobacterium bovis* isolated from livestock in the United States, 1989-2018.  
688 *Front. Vet. Sci.* 5:253, 1–23. doi:10.3389/fvets.2018.00253.
- 689 Patané, J. S. L., Martins, J., Castelão, A. B., Nishibe, C., Montera, L., Bigi, F., et al. (2017). Patterns  
690 and Processes of *Mycobacterium bovis* Evolution Revealed by Phylogenomic Analyses. *Genome*  
691 *Biol. Evol.* 9, 521–535. doi:10.1093/gbe/evx022.
- 692 Pepperell, C. S., Casto, A. M., Kitchen, A., Granka, J. M., Cornejo, O. E., Holmes, E. C., et al. (2013).  
693 The role of selection in shaping diversity of natural *M. tuberculosis* populations. *PLoS Pathog.* 9,  
694 e1003543. doi:10.1371/journal.ppat.1003543.
- 695 Portevin, D., Gagneux, S., Comas, I., and Young, D. (2011). Human Macrophage Responses to Clinical  
696 Isolates from the *Mycobacterium tuberculosis* Complex Discriminate between Ancient and  
697 Modern Lineages. *PLoS Pathog.* 7, e1001307. doi:10.1371/journal.ppat.1001307.
- 698 Price-Carter, M., Brauning, R., De-Lisle, G. W., Livingstone, P., Neill, M., Sinclair, J., et al. (2018).  
699 Whole Genome Sequencing for Determining the Source of *Mycobacterium bovis* Infections in  
700 Livestock Herds and Wildlife in New Zealand. *Front. Vet. Sci.* 5, 1–13.  
701 doi:<https://doi.org/10.3389/fvets.2018.00272>.
- 702 Razo, C. A. P., Hernández, E. R., Ponce, S. I. R., Suazo, F. M., Robbe-Austerman, S., Stuber, T., et al.  
703 (2018). Research article molecular epidemiology of cattle tuberculosis in Mexico through whole-  
704 genome sequencing and spoligotyping. *PLoS One* 13, 1–14. doi:10.1371/journal.pone.0201981.
- 705 Robinson, D. F., and Foulds, L. R. (1981). Comparison of phylogenetic trees. *Math. Biosci.* 53, 131–  
706 147. doi:10.1016/0025-5564(81)90043-2.
- 707 Rodriguez-Campos, S., Schürch, A. C., Dale, J., Lohan, A. J., Cunha, M. V., Botelho, A., et al. (2012).

- 708 European 2 – A clonal complex of *Mycobacterium bovis* dominant in the Iberian Peninsula. *Infect.*  
709 *Genet. Evol.* 12, 866–872. doi:10.1016/j.meegid.2011.09.004.
- 710 Sandoval-Azuara, S. E., Muñoz-Salazar, R., Perea-Jacobo, R., Robbe-Austerman, S., Perera-Ortiz, A.,  
711 López-Valencia, G., et al. (2017). Whole genome sequencing of *Mycobacterium bovis* to obtain  
712 molecular fingerprints in human and cattle isolates from Baja California, Mexico. *Int. J. Infect.*  
713 *Dis.* 63, 48–56. doi:10.1016/j.ijid.2017.07.012.
- 714 Smith, N. H., Berg, S., Dale, J., Allen, A., Rodriguez, S., Romero, B., et al. (2011). European 1: A  
715 globally important clonal complex of *Mycobacterium bovis*. *Infect. Genet. Evol.* 11, 1340–1351.  
716 doi:10.1016/j.meegid.2011.04.027.
- 717 Suchard, M. A., Lemey, P., Baele, G., Ayres, D. L., Drummond, A. J., and Rambaut, A. (2018).  
718 Bayesian phylogenetic and phylodynamic data integration using BEAST 1.10. *Virus Evol.* 4.  
719 doi:10.1093/ve/vey016.
- 720 Taylor, G. M., Murphy, E., Hopkins, R., Rutland, P., and Chistov, Y. (2007). First report of  
721 *Mycobacterium bovis* DNA in human remains from the Iron Age. *Microbiology* 153, 1243–1249.  
722 doi:10.1099/mic.0.2006/002154-0.
- 723 Trentacoste, A., Nieto-Espinet, A., and Valenzuela-Lamas, S. (2018). *Pre-Roman improvements to*  
724 *agricultural production: Evidence from livestock husbandry in late prehistoric Italy.*  
725 doi:10.1371/journal.pone.0208109.
- 726 Valenzuela-Lamas, S., and Albarella, U. (2017). Animal Husbandry across the Western Roman  
727 Empire: Changes and Continuities. *Eur. J. Archaeol.* 20, 402–415. doi:10.1017/eea.2017.22.
- 728 Vargas-Romero, F., Mendoza-Hernández, G., Suárez-Güemes, F., Hernández-Pando, R., and Castañón-  
729 Arreola, M. (2016). Secretome profiling of highly virulent *Mycobacterium bovis* 04-303 strain  
730 reveals higher abundance of virulence-associated proteins. *Microb. Pathog.* 100, 305–311.  
731 doi:10.1016/J.MICPATH.2016.10.014.
- 732 Venables, W. N., and Ripley, B. D. (2002). *Modern Applied Statistics with S.* New York, NY:  
733 Springer-Verlag New York doi:10.1007/978-0-387-21706-2.
- 734 Walker, T. M., Kohl, T. A., Omar, S. V., Hedge, J., Del Ojo Elias, C., Bradley, P., et al. (2015). Whole-  
735 genome sequencing for prediction of *Mycobacterium tuberculosis* drug susceptibility and  
736 resistance: a retrospective cohort study. *Lancet. Infect. Dis.* 15, 1193–1202. doi:10.1016/S1473-  
737 3099(15)00062-6.
- 738 Warren, R. M., Streicher, E. M., Sampson, S. L., van der Spuy, G. D., Richardson, M., Nguyen, D., et  
739 al. (2002). Microevolution of the Direct Repeat Region of *Mycobacterium tuberculosis*:  
740 Implications for Interpretation of Spoligotyping Data. *J. Clin. Microbiol.* 40, 4457–4465.  
741 doi:10.1128/JCM.40.12.4457-4465.2002.
- 742 Waters, W. R., Palmer, M. V., Thacker, T. C., Bannantine, J. P., Vordermeier, H. M., Hewinson, R. G.,  
743 et al. (2006). Early antibody responses to experimental *Mycobacterium bovis* infection of cattle.  
744 *Clin. Vaccine Immunol.* 13, 648–54. doi:10.1128/CVI.00061-06.
- 745 Wedlock, D. N., Aldwell, F. E., Collins, D. M., de Lisle, G. W., Wilson, T., and Buddle, B. M. (1999).  
746 Immune responses induced in cattle by virulent and attenuated *Mycobacterium bovis* strains:  
747 correlation of delayed-type hypersensitivity with ability of strains to grow in macrophages. *Infect.*  
748 *Immun.* 67, 2172–7.
- 749 World Health Organization (2018). *WHO Tuberculosis Report 2018.*
- 750 Wright, D. M., Allen, A. R., Mallon, T. R., McDowell, S. W. J., Bishop, S. C., Glass, E. J., et al.  
751 (2013). Field-Isolated Genotypes of *Mycobacterium bovis* Vary in Virulence and Influence Case  
752 Pathology but Do Not Affect Outbreak Size. *PLoS One* 8, e74503.  
753 doi:10.1371/journal.pone.0074503.
- 754 Xia, E., Teo, Y.-Y., and Ong, R. T.-H. (2016). SpoTyping: fast and accurate in silico *Mycobacterium*  
755 spoligotyping from sequence reads. *Genome Med.* 8, 19. doi:10.1186/s13073-016-0270-7.
- 756 Zimpel, C. K., Brandão, P. E., de Souza Filho, A. F., de Souza, R. F., Ikuta, C. Y., Ferreira Neto, J. S.,

757 et al. (2017a). Complete Genome Sequencing of *Mycobacterium bovis* SP38 and Comparative  
758 Genomics of *Mycobacterium bovis* and *M. tuberculosis* Strains. *Front. Microbiol.* 8, 2389.  
759 doi:10.3389/fmicb.2017.02389.  
760 Zimpel, C. K., Brum, J. S., de Souza Filho, A. F., Biondo, A. W., Perotta, J. H., Dib, C. C., et al.  
761 (2017b). *Mycobacterium bovis* in a European bison (*Bison bonasus*) raises concerns about  
762 tuberculosis in Brazilian captive wildlife populations: a case report. *BMC Res. Notes* 10, 91.  
763 doi:10.1186/s13104-017-2413-3.  
764  
765  
766  
767  
768

769 **Table 1.** Sampling of *Mycobacterium bovis* isolated from overrepresented countries.

| Country          | Available read sets                     | Number of selected read sets              |
|------------------|-----------------------------------------|-------------------------------------------|
| Mexico           | Cattle (395) and non-bovine (17)        | Cattle (195) and non-bovine (17)          |
| Northern Ireland | Cattle (144) and non-bovine (4)         | Cattle (105) and non-bovine (4)           |
| New Zealand      | Cattle (192) and non-bovine (104)       | Cattle (129) and non-bovine (104)         |
| USA              | Cattle (377), Cervid (154), others (51) | Cattle (153), Cervid (71) and others (51) |

770

771

772

773

774

775 **Table 2.** *Mycobacterium bovis* genomes selected for analysis.

| Country          | Number of genomes | Host species (# of selected read sets)                                                                                                          |
|------------------|-------------------|-------------------------------------------------------------------------------------------------------------------------------------------------|
| Brazil           | 3                 | Cattle (1), Bison (1), Llama (1)                                                                                                                |
| Canada           | 6                 | Cattle (5), Elk (1)                                                                                                                             |
| China            | 2                 | Chimpanzee (2)                                                                                                                                  |
| Eritrea          | 12                | Cattle (12)                                                                                                                                     |
| Ethiopia         | 2                 | Cattle (2)                                                                                                                                      |
| France           | 2                 | Cattle (1), Wild boar (1)                                                                                                                       |
| Germany          | 6                 | Human (6)                                                                                                                                       |
| Ghana            | 3                 | Human (3)                                                                                                                                       |
| Great Britain    | 12                | Human (11), Cattle (1)                                                                                                                          |
| Italy            | 2                 | Human (2)                                                                                                                                       |
| Mexico           | 192               | Cattle (175), Human (17)                                                                                                                        |
| New Zealand      | 232               | Cattle (129), Ferret (38), Pig (7), Cervid (4), Stoat (1), Possum (53)                                                                          |
| Northern Ireland | 88                | Cattle (84), Badger (4)                                                                                                                         |
| Panama           | 2                 | Cattle (2)                                                                                                                                      |
| Russia           | 1                 | Human (1)                                                                                                                                       |
| South Africa     | 11                | Cattle (1), Lion (2), Kudu (1), Buffalo (7)                                                                                                     |
| Spain            | 7                 | Cattle (7)                                                                                                                                      |
| Switzerland      | 2                 | Unknown host*                                                                                                                                   |
| Tunisia          | 1                 | Human (1)                                                                                                                                       |
| United States    | 233               | Cattle (124), Coyote (1), Human (2), Cervid (64), Cat (7), Raccoon (12), Wild boar (6), Opossum (9), Jaguar (1), Bobcat (1), Bison (1), Elk (5) |
| Uruguay          | 4                 | Cattle (4)                                                                                                                                      |
| <b>Total</b>     | <b>823</b>        |                                                                                                                                                 |

776 \**Mycobacterium bovis* genomes sequenced by Brites et al. (Brites et al., 2018).

777

778

779

780

781

782

783 **Table 3.** Distribution of *Mycobacterium bovis* lineages in the studied countries.

| <b>Country</b>   | <b>Lb1</b> | <b>Lb2</b> | <b>Lb3</b> | <b>Lb4</b> |
|------------------|------------|------------|------------|------------|
| Eritrea          | 12         | -          | -          | -          |
| Ethiopia         | 2          | -          | -          | -          |
| Tunisia          | 1          | -          | -          | -          |
| France           | 1          | -          | -          | -          |
| Germany          | 1          | 1          | 4          | -          |
| Spain            | 7          | -          | -          | -          |
| Italy            | 2          | -          | -          | -          |
| China            | 2          | -          | -          | -          |
| Russia           | 1          | -          | -          | -          |
| Ghana            | -          | 3          | -          | -          |
| Switzerland      | -          | 2          | -          | -          |
| United States    | 3          | -          | 40         | 186        |
| Mexico           | -          | -          | 17         | 175        |
| Canada           | -          | -          | 2          | 4          |
| Brazil           | -          | -          | 3          | -          |
| South Africa     | -          | -          | 7          | 4          |
| Northern Ireland | -          | -          | -          | 88         |
| Great Britain    | -          | -          | -          | 11         |
| New Zealand      | -          | -          | -          | 232        |
| Panama           | -          | -          | -          | 2          |
| Uruguay          | -          | -          | -          | 4          |
| <b>Total *</b>   | <b>32</b>  | <b>6</b>   | <b>73</b>  | <b>706</b> |

784 Lb - Lineage of *Mycobacterium bovis*. \*From 823 studied genomes, six were not included in the referred  
785 lineages.

786

787

788

789

790

791 **Table 4.** Spoligotype patterns of *Mycobacterium bovis* strains separated by lineages.

| <b>Spoligotype pattern</b> | <b>Lb1</b> | <b>Lb2</b> | <b>Lb3</b> | <b>Lb4</b> |
|----------------------------|------------|------------|------------|------------|
| unknown                    | 1          | 1          | 2          | 11         |
| SB2467                     | 2          | 0          | 0          | 0          |
| SB0134                     | 3          | 0          | 0          | 0          |
| SB0120                     | 17         | 0          | 0          | 1          |
| SB0948                     | 1          | 0          | 0          | 0          |
| SB1517                     | 2          | 0          | 0          | 0          |
| SB0828                     | 5          | 0          | 0          | 0          |
| SB0288                     | 1          | 0          | 0          | 0          |
| SB0944                     | 0          | 4          | 0          | 0          |
| SB1025                     | 0          | 1          | 0          | 0          |
| SB0871                     | 0          | 0          | 1          | 0          |
| SB0121                     | 0          | 0          | 30         | 0          |
| SB0295                     | 0          | 0          | 1          | 0          |
| SB0265                     | 0          | 0          | 28         | 1          |
| SB0339                     | 0          | 0          | 1          | 0          |
| SB1345                     | 0          | 0          | 9          | 28         |
| SB2469                     | 0          | 0          | 1          | 0          |
| SB0821                     | 0          | 0          | 0          | 0          |
| SB1069                     | 0          | 0          | 0          | 0          |
| SB1031                     | 0          | 0          | 0          | 11         |
| SB0267                     | 0          | 0          | 0          | 4          |
| SB1071                     | 0          | 0          | 0          | 1          |
| SB0140                     | 0          | 0          | 0          | 186        |
| SB0263                     | 0          | 0          | 0          | 4          |
| SB1072                     | 0          | 0          | 0          | 1          |
| SB0673                     | 0          | 0          | 0          | 60         |
| SB0307                     | 0          | 0          | 0          | 1          |
| SB1750                     | 0          | 0          | 0          | 1          |
| SB1751                     | 0          | 0          | 0          | 1          |
| SB1502                     | 0          | 0          | 0          | 1          |
| SB1499                     | 0          | 0          | 0          | 1          |
| SB0986                     | 0          | 0          | 0          | 2          |
| SB1348                     | 0          | 0          | 0          | 1          |
| SB0971                     | 0          | 0          | 0          | 2          |
| SB0272                     | 0          | 0          | 0          | 1          |
| SB0980                     | 0          | 0          | 0          | 2          |
| SB0145                     | 0          | 0          | 0          | 202        |
| SB1054                     | 0          | 0          | 0          | 1          |
| SB0130                     | 0          | 0          | 0          | 79         |
| SB0327                     | 0          | 0          | 0          | 11         |
| SB1216                     | 0          | 0          | 0          | 1          |
| SB1758                     | 0          | 0          | 0          | 1          |
| SB1504                     | 0          | 0          | 0          | 56         |
| SB1446                     | 0          | 0          | 0          | 1          |
| SB2011                     | 0          | 0          | 0          | 3          |
| SB1040                     | 0          | 0          | 0          | 27         |
| SB0162                     | 0          | 0          | 0          | 3          |
| <b>Total</b>               | <b>32</b>  | <b>6</b>   | <b>73</b>  | <b>706</b> |

792 Lb - lineages. Six genomes that were not grouped into Lb4 (without Eu1 marker): four have spoligotype  
793 pattern SB1069, one SB0821, and one SB0134.



794

795

796

797

798

799

800

801

802

803

804

805

**Figure 1. Host species and geographical distribution of *Mycobacterium bovis* isolates.** Maximum likelihood phylogenetic tree based on single nucleotide polymorphisms (SNPs) of 823 *Mycobacterium bovis* genomes, using *Mycobacterium tuberculosis* H37Rv as outgroup. The host species are marked in black tips for bovine, red tips for wild animals, green tips for humans, and in blue tips are two genomes with unknown host identification. Geographical locations of the isolates emerging from main nodes A-G (black dots) are colored in donut charts (which do not represent ancestral area reconstruction at nodes): Blue - North America; Black - South and Central America; Purple - Oceania; Pink - Europe; Green - Southern Africa; Orange - Eastern, Western and Northern Africa; Light blue - Asia. Phylogenetic tree was generated using IQ-Tree with 1,000 bootstrap values and annotated using FigTree v1.4.3 and Mind the Graph. Bootstrap values of discussed nodes are all  $\geq 95\%$  and can be

806 visualized in Supplementary Figure S2 and Supplementary File 2. Bar shows substitutions per nucleotide.  
807



808  
809 **Figure 2. Clonal complexes characterization.** Maximum likelihood phylogenetic trees based on  
810 single nucleotide polymorphisms (SNPs) of 823 *Mycobacterium bovis* genomes, using  
811 *Mycobacterium tuberculosis* H37Rv as outgroup. Phylogenetic tree colored based on clades and  
812 clonal complexes (CC). Clonal complexes (tips): African 1 in green, African 2 in light blue, European 1  
813 in dark blue, and European 2 in yellow. Genomes without clonal complexes markers are shown in  
814 black. †: Cluster containing three *M. bovis* genomes of CC African 2 and 29 *M. bovis* genomes without  
815 CC markers. \*\*: Cluster containing three *M. bovis* genomes without CC markers (black tips), but closely  
816 related to *M. bovis* of Eu2 CC marked in yellow. ▲: Cluster containing six *M. bovis* genomes without CC  
817 markers (black tips), but closely related to *M. bovis* of CC Eu1 marked in dark blue. Black dots: main  
818 nodes A-G. Phylogenetic tree was generated using IQ-Tree with 1,000 bootstrap values and annotated

819 using FigTree v1.4.3 and Mind the Graph. Bootstrap values of discussed nodes are all  $\geq 95\%$  and can be  
820 visualized in Supplementary Figure S2 and Supplementary File 2. Bar shows substitutions per nucleotide.  
821



822 **Figure 3. SNP (single nucleotide polymorphism) markers of *Mycobacterium bovis*.** Maximum  
823 likelihood phylogenetic trees based on single nucleotide polymorphisms (SNPs) of 823 *Mycobacterium*  
824 *bovis* genomes, using *Mycobacterium tuberculosis* H37Rv as outgroup. Clonal complexes: African 1  
825 (Af1) and European 1 (Eu1). Phylogenetic tree was generated using IQ-Tree with 1,000 bootstrap values  
826 and annotated using FigTree v1.4.3. Bootstrap of discussed nodes are all  $\geq 95\%$  and can be  
827 visualized in Supplementary Figure S2 and Supplementary File 2. Bar shows substitutions per nucleotide.  
828



829

830

831

832

833

834

835

836

837

**Figure 4. *Mycobacterium bovis* lineages and evolutionary data.** Maximum likelihood phylogenetic tree of 823 *M. bovis* genomes colored based on the proposed Lineages: Lb1 - purple; Lb2 - green; Lb3 - pink; Lb4 - blue; uncharacterized genomes - grey. Estimated divergence results in years BP (Before Present) of the main nodes are marked with triangles. Outgroup: \**Mycobacterium tuberculosis* H37Rv. Phylogenetic tree was generated using IQ-Tree with 1,000 bootstrap values and annotated using FigTree v1.4.3. Bootstrap of discussed nodes are all  $\geq 95\%$  and can be visualized in Supplementary Figure S2 and Supplementary File 2. Bar shows substitutions per nucleotide.



838

839

840

841

842

843

**Figure 5. Principal component analysis (PCA) of *Mycobacterium bovis* lineages.** Principal Component Analysis constructed using the SNP (single nucleotide polymorphism) matrix of the 823 *Mycobacterium bovis* genomes. The four inferred *M. bovis* lineages are shown in purple - Lb1; green - Lb2; pink - Lb3; blue - Lb4; uncharacterized lineage - black. Circles represent *M. bovis* genomes emerging from the described nodes (E, F, G) of the phylogenetic tree depicted in Figure 1.
